# Supplementary material for: Evaluating the performance of a Picarro G2207-i analyser for high-precision atmospheric O 2 measurements
Source: Copernicus journal article supplement (doi:10.5194/amt-2022-207), 2022-07-19
Supplement: Supplementary file [file amt-2022-207-AC2-supplement.pdf]

We thank the referee very much for their positive review of our manuscript. We have addressed each of their comments below, with their comments shown in black and our responses in blue.

Fleming and coauthors present an evaluation of a commercial cavity ring-down spectrometer, both in terms of its ability to meet WMO compatibility criteria for O<sub>2</sub>/N<sub>2</sub> under specific conditions, and its suitability for in situ measurements.

The suggested advantages of the Picarro analyzer are that it can be run without sample drying and does not require continuous reference gas flow. This would make it attractive for installation at a remote site. However, the authors show that the instrument is unsuitable for such an application, due to the large artifacts the analyzer is subject to under such conditions. As the authors show, it does perform reasonably well when measuring tanks. For this reason I think the authors focus a bit too much on the compatibility/repeatability goals of the Picarro under laboratory conditions. Much more telling is the in situ data. I am not sure the ffCO<sub>2</sub> discussion adds much to the paper, since it relies on CO<sub>2</sub> measurements not made by the Picarro analyzer. The in situ comparison presented is more to the point, and sufficient for the demonstration. The authors could even cut the ffCO<sub>2</sub> comparison from the paper to reduce the length, in my opinion.

We carefully considered this suggestion to delete the ffCO<sub>2</sub> comparison text (section 3.5), but decided against it. In our opinion, this section provides a valuable case study of an application of O<sub>2</sub> measurements that is becoming increasingly used by scientists and which has significant policy relevance (see, for example, Pickers *et al.*, Science Advances, 2022 (<https://www.science.org/doi/10.1126/sciadv.abl9250>)). Furthermore, this section demonstrates that for an application where one does not need to meet the WMO compatibility goal in order to make meaningful conclusions, the Picarro O<sub>2</sub> analyser, in its current form, is still not good enough.

The point about this section relying on CO<sub>2</sub> measurements not made by the Picarro analyser is not relevant. Every atmospheric O<sub>2</sub> application also requires CO<sub>2</sub> measurements to be made, but no analyser exists that measures both O<sub>2</sub> and CO<sub>2</sub>. So every laboratory or field station making O<sub>2</sub> measurements also needs an independent CO<sub>2</sub> analyser making concurrent measurements. Also, the measurement uncertainty of our CO<sub>2</sub> analyser is at least an order of magnitude lower than that of the Picarro O<sub>2</sub> analyser, thus the uncertainty we report for the ffCO<sub>2</sub> calculations in this section are almost entirely based on the Picarro O<sub>2</sub> measurement uncertainty (as well as other uncertainties inherent in the ffCO<sub>2</sub> methodology as we discuss, for example, uncertainty in the O<sub>2</sub> baseline determination).

I think this is an excellent paper and of interest to the AMT readership. I recommend publication with only minor comments.

#### Minor Comments

L17 and throughout: It would be easier on the reader to stick with a single unit, rather than switching between ppm and per meg.

We agree that using per meg consistently would be less complicated, however the cylinder data used to calculate the Allan deviation was not calibrated. But to assist the reader, approximate per meg values relating to these ppm values using a conversion factor of 4.8 per meg/ppm have now been added in parenthesis.

L17: I think the wording needs refining here, do you mean that the highest precision possible was found at 300 seconds? What does it mean to report an Allan deviation as 1 standard deviation? For an abstract I think it's sufficient to say that you estimated the precision to be 1 ppm, reported as 1 sigma, from 300 second means.

This has been rewritten and now relates to the best precision achievable: "we found that the best precision was achieved with 30 minute averaging and was  $\pm 0.5$  ppm ( $\sim \pm 2.4$  per meg)" - With the updated ppm values being pulled from the rewritten discussion of the updated Figure 2 (L264).

L21: pre-dried is confusing, suggest "dried". The grammar is a little off in this sentence due to the mixing of tenses.

The sentence has been changed to have a consistent tense, and we removed "pre-" from "pre-dried". It now reads: "When sample air was dried and a 5-hourly baseline correction with a reference gas cylinder was employed,..."

L24: The abstract is quite long, suggest cutting "(sometimes known as a "surveillance tank")"

(sometimes known as a "surveillance tank") has been removed from the abstract, and added into the main body (p8 L212).

L43: Better to give the increase of CO<sub>2</sub> over the same period as O<sub>2</sub> (past three decades).

This has been rewritten to: "over the same period, atmospheric CO<sub>2</sub> has been increasing at an average rate of 2 ppm yr<sup>-1</sup>"

L55: I think it's confusing to give an approximate definition for APO when saying it is defined as, better to give the actual equation.

The full equation is likely to confuse readers as it includes (very minor) CH<sub>4</sub> and CO terms, but we also understand the referee's point that the "approximate" sign is confusing. So rather than write the full equation, we have changed the approximate sign to an equals sign, and added to the text: "... and where we have ignored very minor influences from methane and carbon monoxide." A minus sign was also added to the O<sub>2</sub>:CO<sub>2</sub> OR value of -1.1, as it had been inadvertently missed out.

L62: It would be good to define compatibility here...in L66 it seems conflated with precision. Doesn't compatibility combine accuracy and precision into a single metric?

Compatibility has now been defined on L67-68, with the addition of the following: "where compatibility refers to the acceptable level of agreement between two field stations or laboratories when measuring the same air sample." The term precision here has been replaced with repeatability, as is used throughout the rest of the paper, and has also been defined here for clarification (L73-74) as: "Repeatability refers to the closeness of agreement between results of measurements of the same measure (which is also sometimes referred to as the measurement system's precision)".

L81-84: To measure O<sub>2</sub> with high precision and accuracy you need all of these things. The author is suggesting that they can all be contained within a single box, which is certainly convenient. "Revolutionize" seems a bit too strong to me. There might be some savings in avoiding the continuous use of a reference gas, but the Picarro analyzer is expensive, and all of the other expensive, labor intensive aspects to making in situ measurements would still be needed.

The word “revolutionise” has been changed to the softer “advance”.

However, we don’t completely agree with the referee – the potential of the Picarro O<sub>2</sub> analyser is much more than simply less use of reference gases; furthermore, we disagree that the Picarro analyser is any more expensive than other O<sub>2</sub> systems, especially when taking into account the significant labour costs needed to improve other systems to sufficient precision and accuracy.

Thus, we believe that if the Picarro analyser were to work as it was intended, then it would have a very significant impact on the field of high-precision O<sub>2</sub> measurements, primarily by making such technically difficult and challenging measurements much more accessible to a wider scientific community via an easier to use “off-the-shelf” analyser.

L89-91: And yet the authors go on to show that the instrument does NOT have all of these advantages. I think this needs some rephrasing...“the vendor suggests that” or “it is intended for” use without drying, cal gas, etc. To be fair to Picarro, maybe this is not what they had in mind. There are other applications for this instrument beyond the small field of high-precision atmospheric monitoring.

This sentence has been rephrased to: “, it is intended that the G2207-*i* should not require a continuous reference gas supply”.

L125: What's the flow rate, and how big is the cell? Does it really take 8 minutes to flush it? This is an extremely long e-folding time. It would be nice to see some of the actual calibration data. If the sample air is wet and the calibration gases are dry, isn't it more likely it's a surface effect rather than a purging issue?

The referee is correct: flushing does not take 8 minutes, and for the CRAM Lab tests we were switching only between dry cylinders (that is, there were no issues of changing between wet and dry air, and thus no surface effects to be concerned with). 20 and 8 minutes (analysis and flushing times, respectively) were chosen to match the times during subsequent field tests at our WAO station. The following phrase has been added to reflect this (L137: “... and to maintain consistency with the flushing time employed in subsequent WAO tests (section 2.3.2)”. Additional explanation of the cylinder run-time has also been added to section 2.3.2 (L216-217).

Figure 1: How is pressure/flow control maintained for the Oxzilla? I see no pump depicted.

The Oxzilla and Siemens have an independent flow and pressure control set-up (which includes a pump), sampling from a different AAI to the Oxzilla, which contains too many components and is unnecessary to be depicted in this gas handling diagram. So for clarity L179 has been edited to read: “A diagram of the gas handling set-up for the G2207-*i* at WAO is displayed in Fig.1.” The caption for Figure 1 has also been edited to “Calibration gases were shared with the established O<sub>2</sub> and CO<sub>2</sub> system (using V4), but the established system has its own AAI, pump, drying system, and pressure and flow control (not depicted here).”

L173: change "scales," to "scales. This"

Changed.

L177: There are also surface effects to consider, the dilution effect is not the sole reason.

Yes, good point. But in the case of O<sub>2</sub> (much less true for CO<sub>2</sub> and other trace gases), the dilution effect far outweighs any possible biases from surface effects. Therefore we chose not to change this text.

L202: Really? Again, I find this surprising.

The referee is correct in that the 8 minutes isn't necessary solely for flushing of the Picarro's cell. But, particularly for O<sub>2</sub> measurement, we find that relatively long flushing times are needed whenever valves are cycled and a new air stream is introduced. We (the high-precision atmospheric O<sub>2</sub> community) suspect this is related to equilibration times needed on the surfaces of all wetted materials for all components (tubing, valves, pressure regulators, etc). Thus an 8-minute flushing time was chosen to match the existing O<sub>2</sub> measurement system, as this has been proven to be sufficient. The following sentence has been added to clarify this: "A flushing period of 8 minutes and averaging time of 12 minutes were chosen to match that of the established system."

L250: Please give +/- on cavity pressure, temperature, and flow.

According to the Picarro data files the cavity pressure's standard deviation was  $\pm 0.00146$  torr and the cell temperature's standard deviation was  $\pm 0.000306$  °C. We don't think the sensors are precise enough to report standard deviations to this level, so they are effectively zero.

Figure 2: It would be nice to see the x-axis extended here, since the time horizon for the RT (5 hours) is outside of the plot.

When the x-axis is increased to 5-hours, the noise overtakes the signal and the important features in the plot can no longer be seen. We also don't think that the Allan deviation directly relates to the RT interval, but to the measurement averaging time. We have extended the x-axis so that 1 hour is visible, as this is the frequency we are averaging when investigating the in-situ air measurements. The text has also been amended to reflect this (L265): "Precision then continues to improve until around a 30 minute averaging time where a precision of ~0.5 ppm (~2.4 per meg) is reached, and remains around that value for averaging times up to around 1 hour"

L366: I don't fully understand this. It looks like the grey points are jumping at calibration intervals, and the calibration coefficients were not interpolated between calibrations, but applied stepwise. Why would the Picarro instrument's baseline jump always at calibration times? This is actually the only shortcoming of the paper--it would be nice if the author's could speculate more as to what is going on to cause these baseline shifts.

The calibration coefficients were applied step-wise, which is why there is a step change after each calibration. The baseline doesn't jump at calibration times, but it is drifting- hence when a new calibration is applied the baseline shift is applied to the measurements. The reference tank correction is interpolated, which corrects for the baseline drift.

For clarity the text has been edited to read: "the large jumps in the G2207-i O<sub>2,NC</sub> values following WSS calibrations (see Fig. 7b, grey points) are caused by a drift in the analyser's baseline, which only become applied to the data after each calibration. These jumps were reduced through the application of the 5-hour RT interpolation procedure (see 7b, blue points) which constrained the baseline drift (refer to Section 2.3.2). After the application of the RT interpolation the jumps between WSS calibrations were vastly reduced (see Fig. 7), thus the ffCO<sub>2</sub> results in section 3.5 have this correction applied."

Figure 8: I think it would be better to drop the no RT Picarro data here, zoom in on the y-axis, and make the points open circles (and smaller)--it is hard to see the data which matters, which is the Oxzilla vs the RT-corrected Picarro.

The no RT data has been removed from the figure, but retained in Table 3 and the discussion in the text.

L400: "which provides a measure of the compatibility to the SIO O2 scale over time" -- I'm not sure that's quite correct, unless the tanks are being remeasured at SIO for each comparison.

This sentence has been removed.

L455: Maybe it's worth pointing out here (or earlier) that for in situ measurements, the O<sub>2</sub>/N<sub>2</sub> ratio will be changing over tens of minutes. Averaging down pure random noise is not the same as averaging observations over an hour.

The following sentence has been added to section 3.1 (L266) : "It should be noted, that unlike the hourly average and standard deviation obtained from measurement of cylinder air, the hourly averages of atmospheric data also contain natural variability in addition to analyser-related noise and drift."
